# Supplementary material for: Covalent triazine-based frameworks with cobalt-loading for visible light-driven photocatalytic water oxidation
Source: Royal Society of Chemistry journal article supplement (doi:10.1039/d2cy00773h), 2022-01-01
Supplement: d2cy00773h1.pdf [file d2cy00773h1.pdf]

## Supporting Information

### Covalent Triazine Frameworks with Cobalt-Loading for Visible Light-Driven Photocatalytic Water Oxidation

*Hongmei Chen,<sup>a</sup> Adrian M. Gardner,<sup>b</sup> Guoan Lin,<sup>c</sup> Wei Zhao,<sup>a</sup> Mounib Bahri,<sup>d</sup> Nigel D. Browning,<sup>d</sup> Reiner Sebastian Sprick<sup>a,e</sup> Xiaobo Li<sup>f,a,\*</sup> Xiaoxiang Xu<sup>c,\*</sup> and Andrew I. Cooper<sup>a,\*</sup>*

<sup>a</sup>Department of Chemistry and Materials Innovation Factory, University of Liverpool, Liverpool L7 3NY, U.K.

<sup>b</sup>Stephenson Institute for Renewable Energy, University of Liverpool, Liverpool L69 7ZF, U.K.

<sup>c</sup>Clinical and Central Lab, Putuo People's Hospital and Shanghai Key Lab of Chemical, Assessment and Sustainability, School of Chemical Science and Engineering, Tongji University, Shanghai 200060, China

<sup>d</sup>Albert Crewe Centre for Electron Microscopy, University of Liverpool, Liverpool L69 3GL, U.K.

<sup>e</sup>Department of Pure and Applied Chemistry, University of Strathclyde, Thomas Graham Building, 295 Cathedral Street, Glasgow G1 1XL, U.K.

<sup>f</sup>Key Laboratory of the Ministry of Education for Advanced Catalysis Materials, Zhejiang Key Laboratory for Reactive Chemistry on Solid Surfaces, Institute of Physical Chemistry, Zhejiang Normal University, Jinhua 321004, China

## Monomer synthesis

**Terephthalamidine dihydrochloride [1]:** Benzene-1,4-dicarbonitrile (1.28 g, 10.0 mmol) was dissolved in 20 mL THF, and then under stirring 40 mL of 1 M LiN(SiMe<sub>3</sub>)<sub>2</sub> solution was added dropwise while cooled with an ice bath (0 °C). The obtained mixture was kept at room temperature (25 °C) for 3 h, and then cooled back to 0 °C. 40 mL of 6 M HCl–EtOH was added to quench the reaction, and the mixture was left overnight before filtration. The precipitate was washed with Et<sub>2</sub>O, and the final product (2.26 g, 96%) was recrystallized from H<sub>2</sub>O–EtOH mixture. <sup>1</sup>H NMR (400 MHz, DMSO-d<sub>6</sub>): δ = 9.63 (s, 4H, NH), 9.37 (s, 4H, NH), 8.03 (s, 4H, aromatic H).

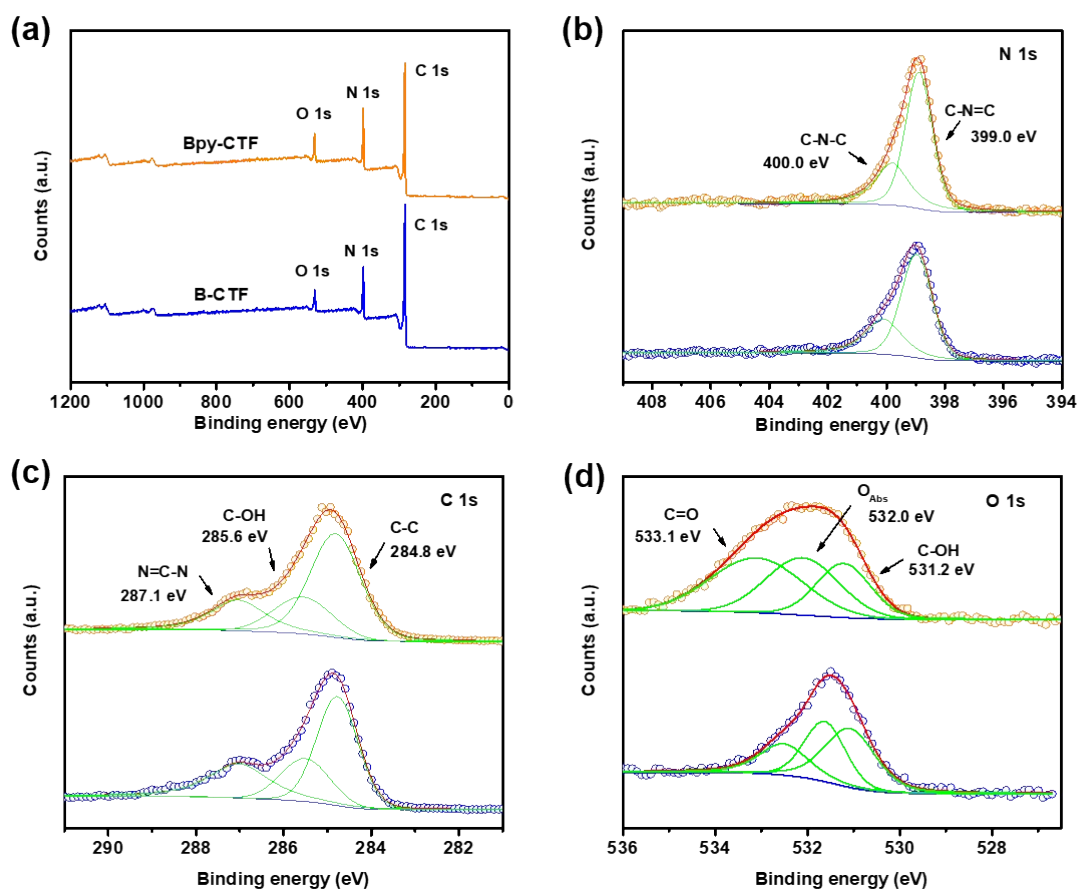

**Figure S1.** (a) Low-resolution XPS survey. High-resolution XPS spectra of (b) N 1s; (c) C 1s; (d) O 1s of Bpy-CTF (top) and B-CTF (bottom).

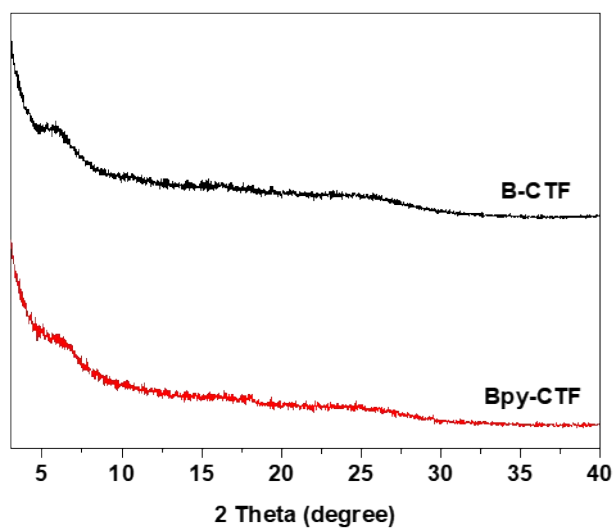

**Figure S2.** PXRD patterns of Bpy-CTF and B-CTF.

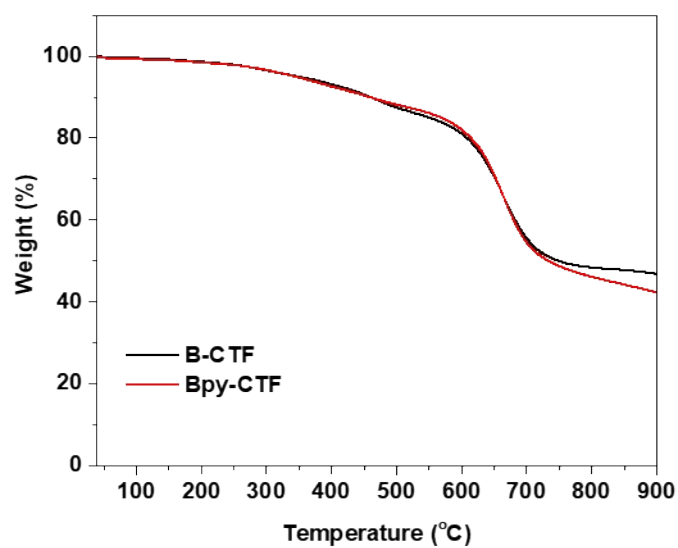

**Figure S3.** TGA of Bpy-CTF and B-CTF in a nitrogen atmosphere.

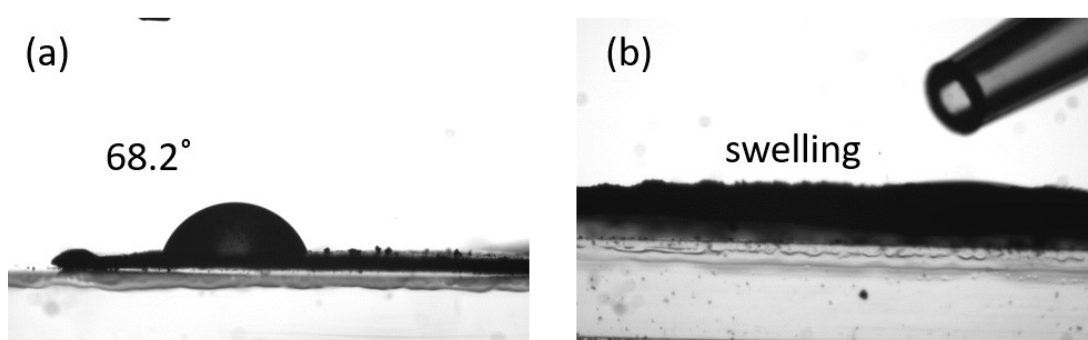

**Figure S4.** Water contact angles of (a) B-CTF and (b) Bpy-CTF.

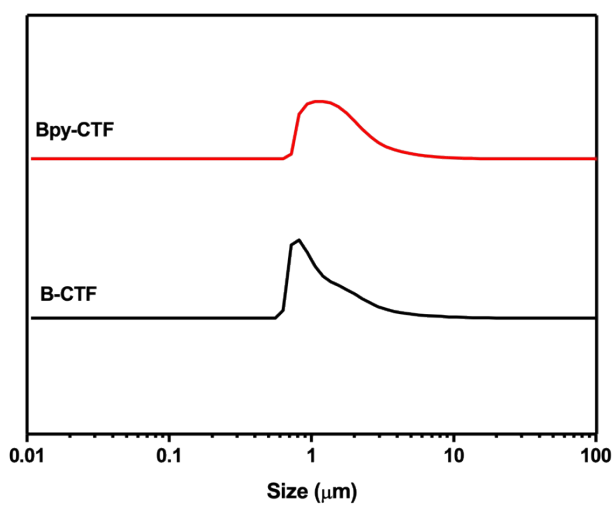

**Figure S5.** Particle size distribution of (a) Bpy-CTF and (b) B-CTF obtained from static light scattering measurements in water.

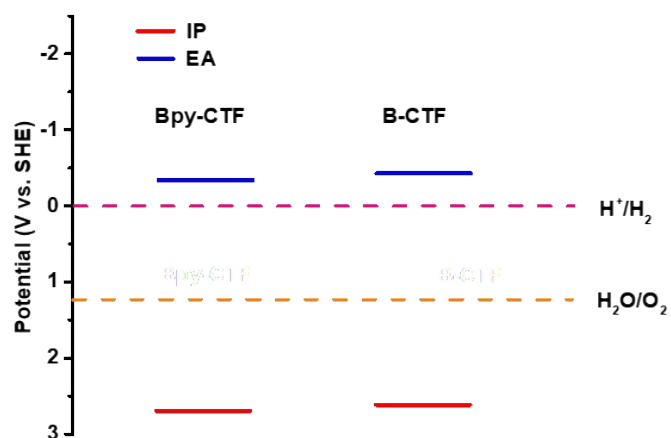

**Figure S6.** Scheme showing calculated IP, EA of Bpy-CTF and B-CTF [2].

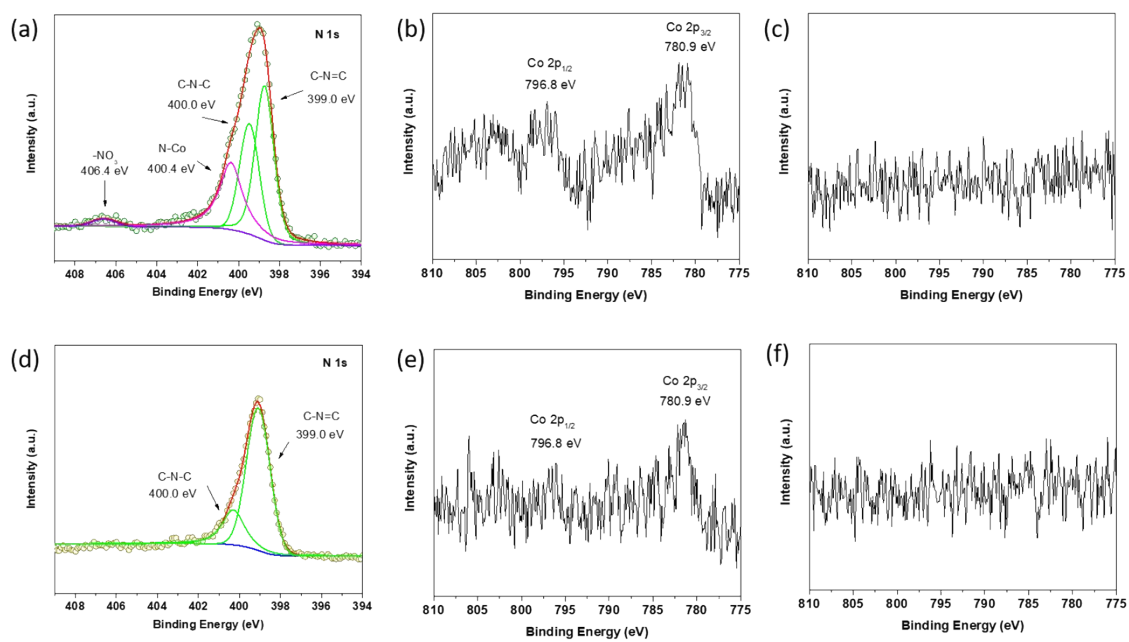

**Figure S7.** High resolution XPS spectra of (a) N 1s and (b) Co 2p of Bpy-CTF-Co-3; (c) Co 2p of Bpy-CTF; (d) N 1s and (e) Co 2p of B-CTF-Co-3; (f) Co 2p of B-CTF.

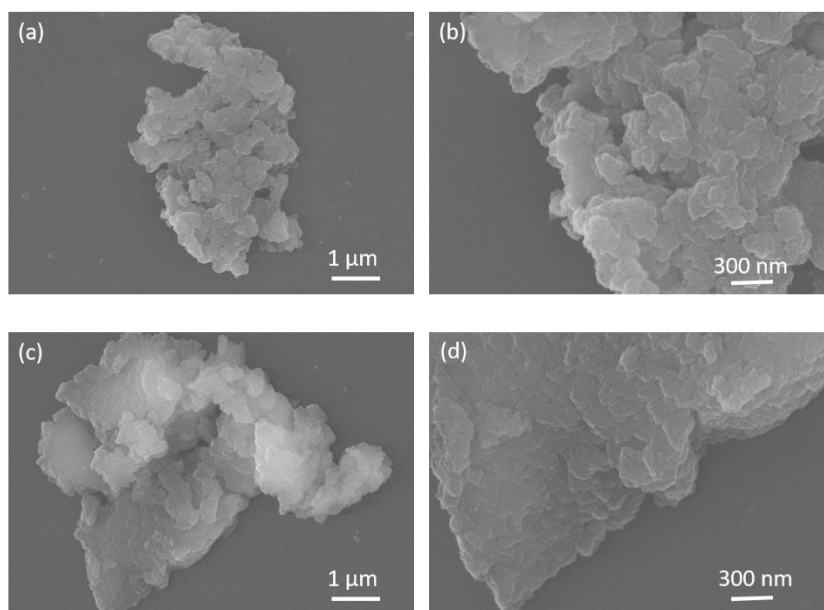

**Figure S8.** SEM images of (a), (b) Bpy-CTF-Co-1; (c), (d) B-CTF-Co-1.

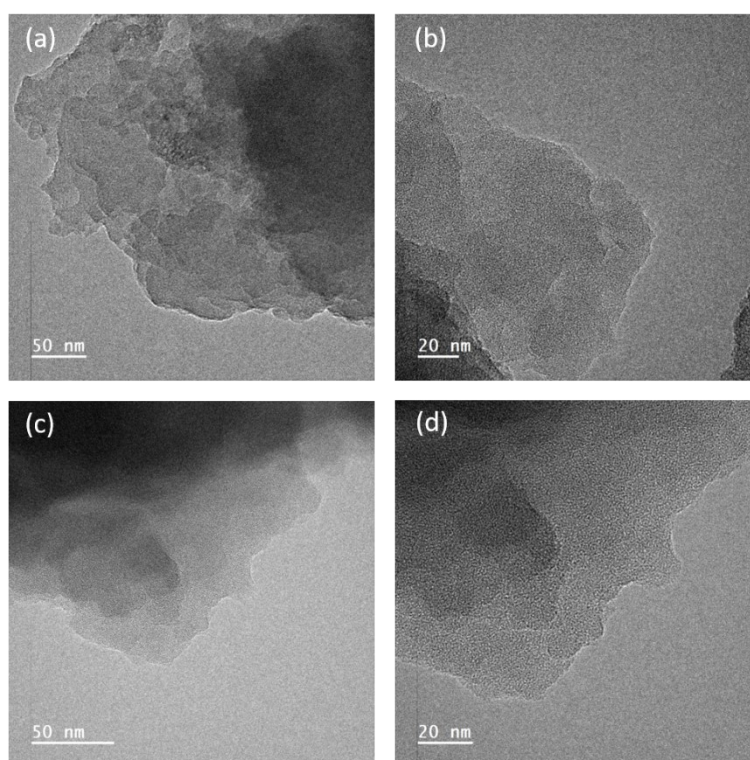

**Figure S9.** TEM images of (a), (b) Bpy-CTF-Co-1; (c), (d) B-CTF-Co-1.

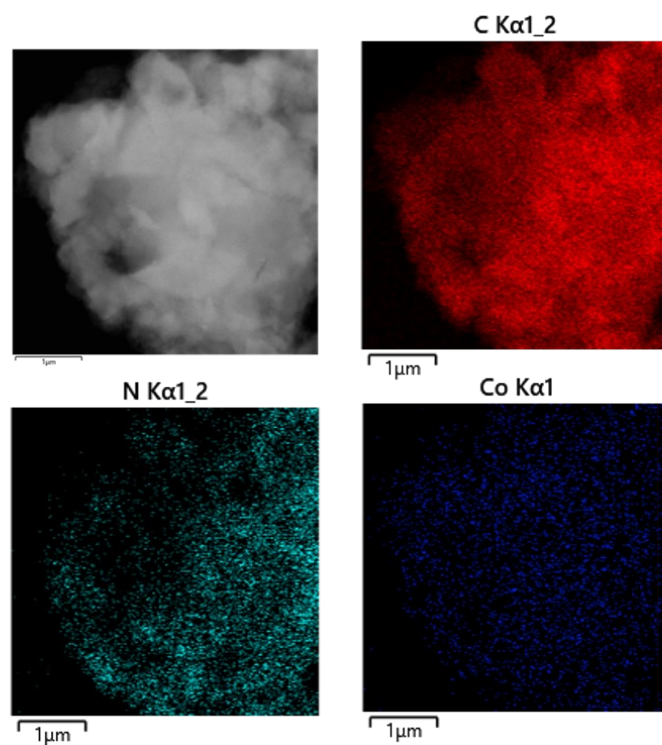

**Figure S10.** TEM image and element mapping of C, N, and Co of Bpy-CTF-Co-1.

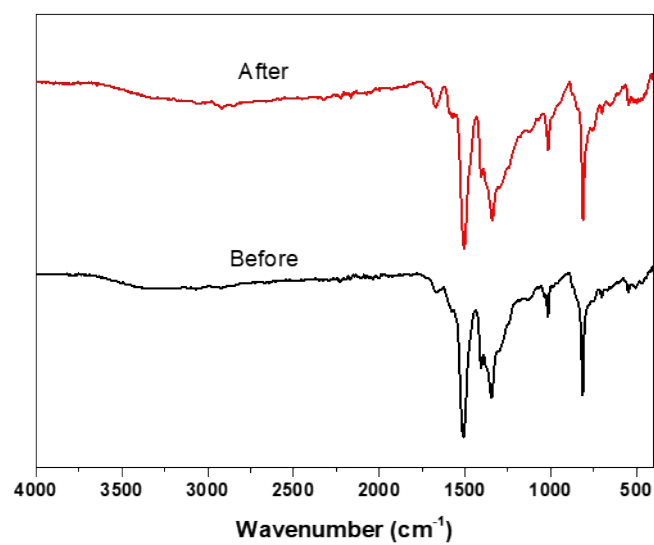

**Figure S11.** FT-IR spectra of Bpy-CTF-Co-3 before and after oxygen evolution.

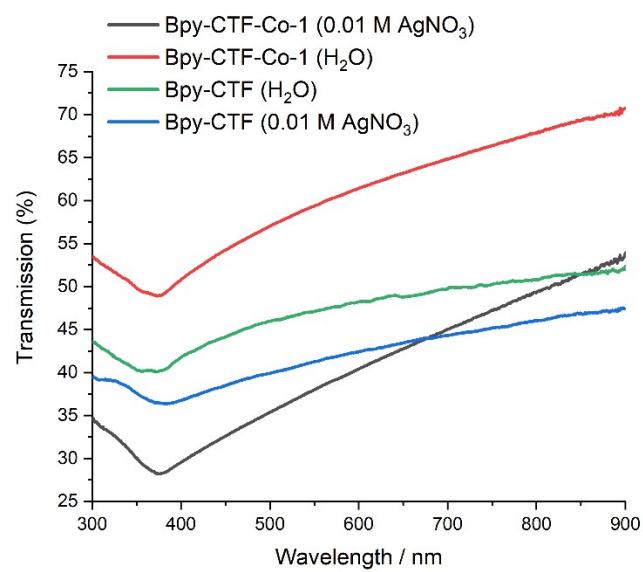

**Figure S12.** UV/Vis of 2 mg of Bpy-CTF and Bpy-CTF-Co-1 in 20 ml of pure H<sub>2</sub>O or 20 ml of 0.01 M AgNO<sub>3</sub> in 10 mm pathlength cuvette.



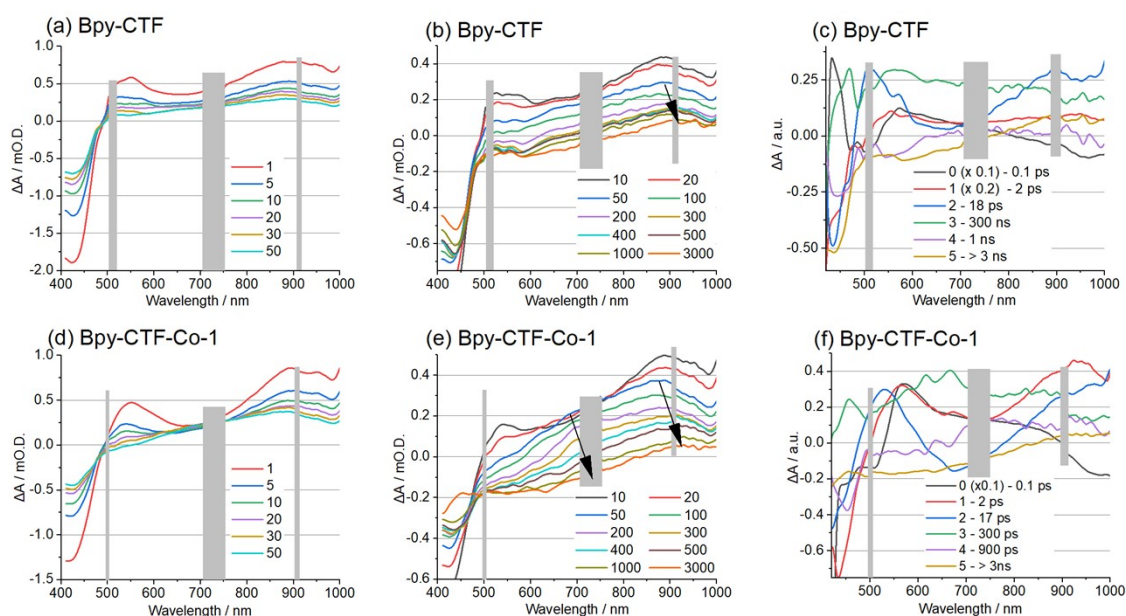

**Figure S13.** TA spectra (365 nm pump), normalised at the global maximum  $\Delta A$ , at key pump-probe wavelengths as indicated (in ps) for (a) and (b) Bpy-CTF and (d) and (e) Bpy-CTF-Co-1 in pure  $H_2O$ . DADS for (c) Bpy-CTF and (f) Bpy-CTF-Co-1 from a 6-compartment parallel fit; DADS of compartment-0 is scaled by  $\times 0.1$  for Bpy-CTF and Bpy-CTF-Co-1 and compartment-1 is scaled by  $\times 0.2$  for Bpy-CTF; decay times for each compartment are indicated. The grey area at  $\sim 500$  nm and  $\sim 900$  nm indicates where spectra obtained in different spectral ranges (400 – 500 nm, 500 – 900 nm and 900-1000 nm) have been spliced and between 710 – 755 nm where spectra obtained in a single spectral range (500 – 900 nm) are contaminated by detected pump laser scatter ( $2\lambda$ ).

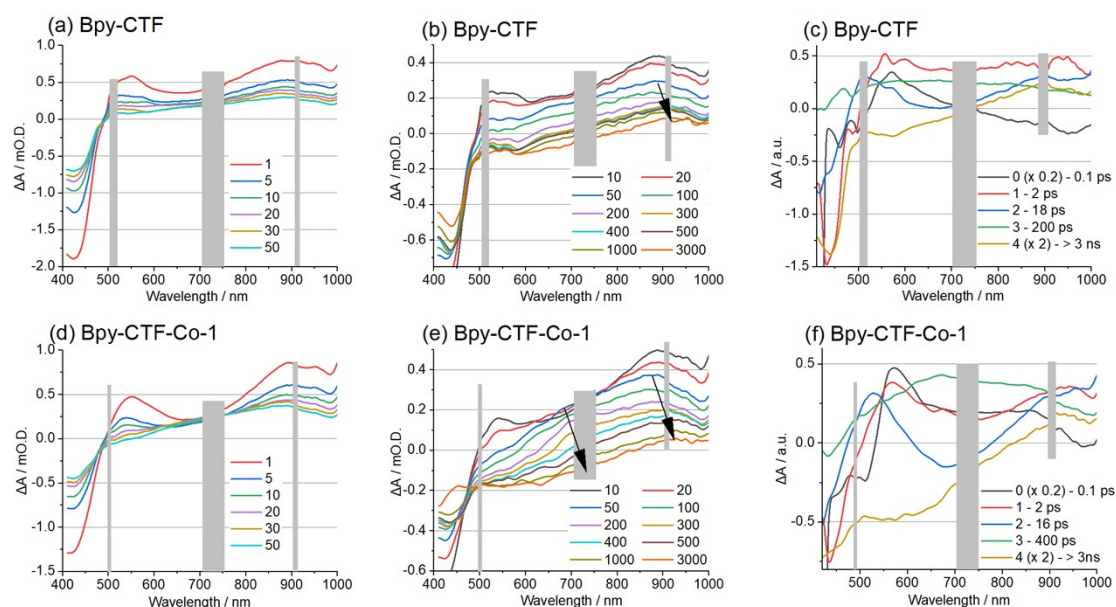

**Figure S14.** TA spectra (365 nm pump), normalised at the global maximum  $\Delta A$ , at key pump-probe wavelengths as indicated (in ps) for (a) and (b) Bpy-CTF and (d) and (e) Bpy-CTF-Co-1 in pure  $H_2O$ . DADS for (c) Bpy-CTF and (f) Bpy-CTF-Co-1 from a 5-compartment parallel fit; DADS of compartment-0 is scaled by  $\times 0.2$  and compartment-4 is scaled by  $\times 2$  for Bpy-CTF and Bpy-CTF-Co-1; decay times for each compartment are indicated. The grey area at  $\sim 500$  nm and  $\sim 900$  nm indicates where spectra obtained in different spectral ranges (400 – 500 nm, 500 – 900 nm and 900-1000 nm) have been spliced and between 710 – 755 nm where spectra obtained in a single spectral range (500 – 900 nm) are contaminated by detected pump laser scatter ( $2\lambda$ ). **Note the poor agreement between compartment 4 and the 3 ns TA spectrum in the 600 – 700 nm region of Bpy-CTF and in the 400 – 550 and 675 – 800 nm regions for Bpy-CTF-Co-1.**

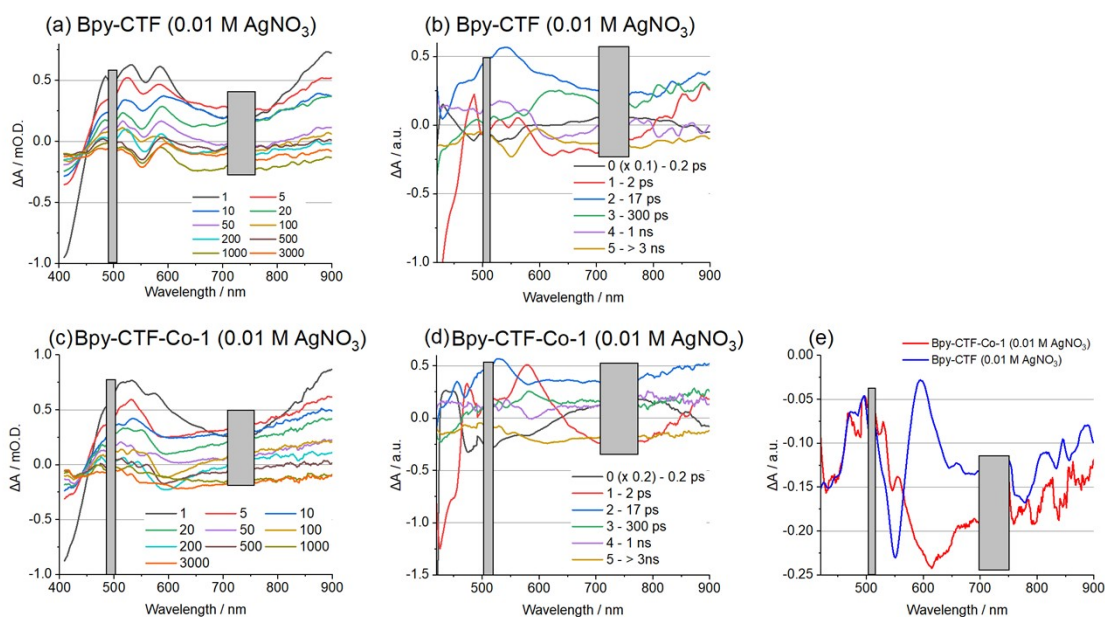

**Figure S15.** TA spectra (365 nm pump) ), normalised at the global maximum  $\Delta A$ , at key pump-probe wavelengths as indicated (in ps) for (a) Bpy-CTF and (c) Bpy-CTF-Co-1 in 0.01 M  $\text{AgNO}_3$ . DADS for (b) Bpy-CTF and (d) Bpy-CTF-Co-1 from a 6-compartment parallel fit; DADS of compartment-0 is scaled by  $\times 0.1$  and  $\times 0.2$  for Bpy-CTF and Bpy-CTF-Co-1 respectively; decay times for each compartment are indicated. (e) Comparison of the DADS of compartment 5 for Bpy-CTF (blue) and Bpy-CTF-Co-1 (red). The grey area at  $\sim 500$  nm indicates where spectra obtained in different spectral ranges (400 – 500 nm and 500 – 900 nm) have been spliced, and between 710 – 755 nm where spectra obtained in a single spectral range (500 – 900 nm) are contaminated by detected pump laser scatter ( $2\lambda$ ).

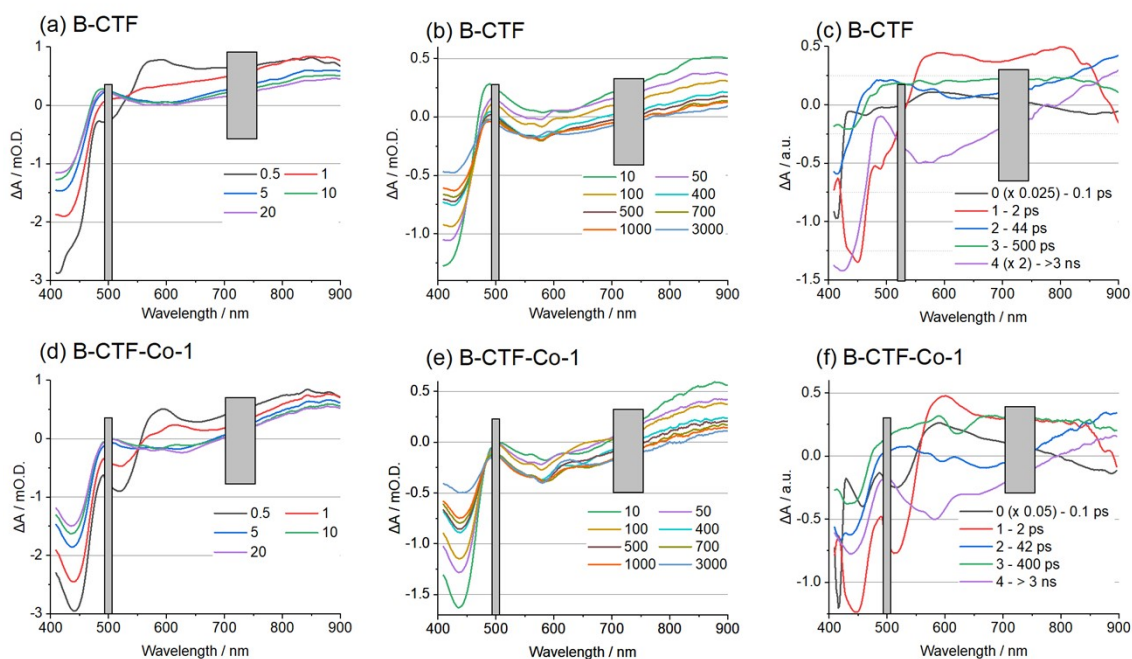

**Figure S16.** TA spectra (365 nm pump), normalised at the global maximum  $\Delta A$ , at key pump-probe wavelengths as indicated (in ps) for (a) and (b) B-CTF and (d) and (e) B-CTF-Co-1 in pure  $H_2O$ . DADS for (c) B-CTF and (f) B-CTF-Co-1 from a 5-compartment parallel fit; DADS of compartment-0 is scaled by  $\times 0.025$  and  $\times 0.05$  for B-CTF and B-CTF-Co-1 respectively, and DADS of compartment 4 scaled by  $\times 2$  for B-CTF; decay times for each compartment are indicated. The grey area at  $\sim 500$  nm indicates where spectra obtained in different spectral ranges (400 – 500 nm, 500 – 900 nm and 900-1000 nm) have been spliced and between 710 – 755 nm where spectra obtained in a single spectral range (500 – 900 nm) are contaminated by detected pump laser scatter ( $2\lambda$ ).

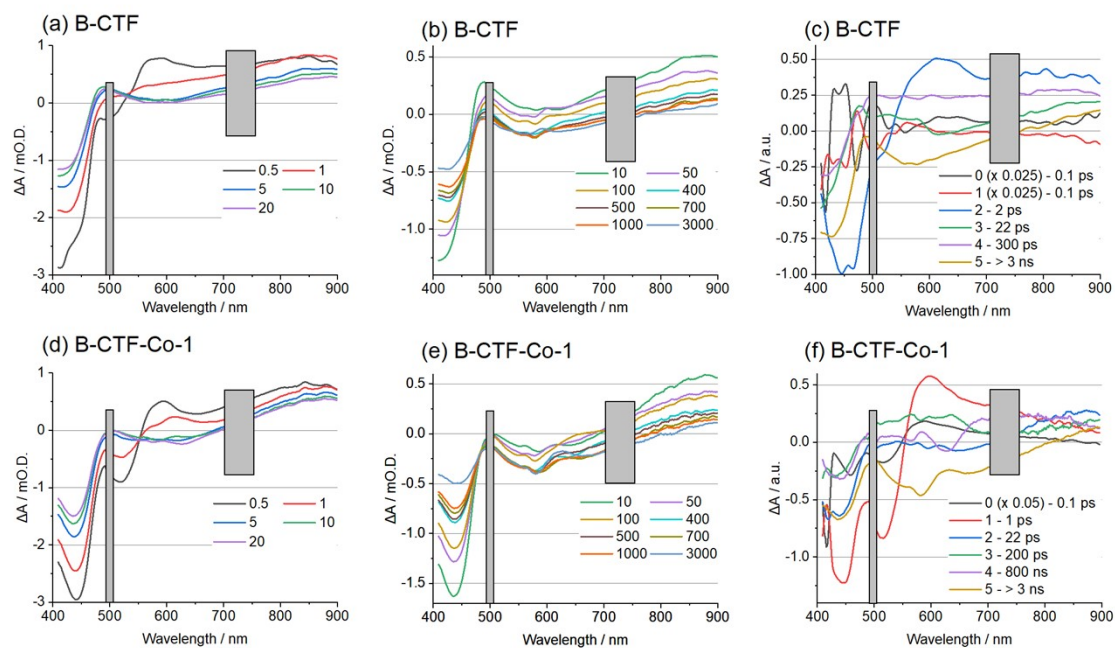

**Figure S17.** TA spectra (365 nm pump), normalised at the global maximum  $\Delta A$ , at key pump-probe wavelengths as indicated (in ps) for (a) and (b) B-CTF and (d) and (e) B-CTF-Co-1 in pure  $H_2O$ . DADS for (c) B-CTF and (f) B-CTF-Co-1 from a 6-compartment parallel fit; DADS of compartment-0 is scaled by  $\times 0.025$  and  $\times 0.05$  for B-CTF and B-CTF-Co-1 respectively, and DADS of compartment-1 scaled by  $\times 0.05$  for B-CTF; decay times for each compartment are indicated. The grey area at  $\sim 500$  nm indicates where spectra obtained in different spectral ranges (400 – 500 nm, 500 – 900 nm and 900-1000 nm) have been spliced and between 710 – 755 nm where spectra obtained in a single spectral range (500 – 900 nm) are contaminated by detected pump laser scatter ( $2\lambda$ ).

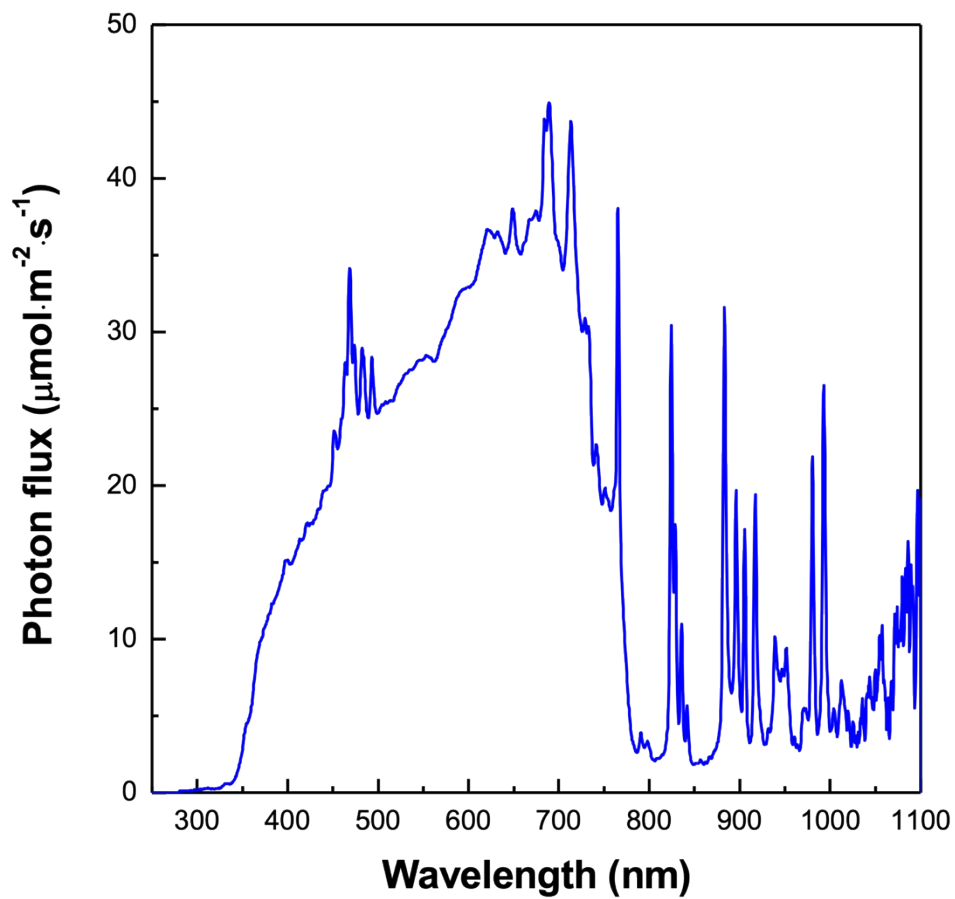

**Figure S18.** The emission spectrum and the intensity of the 300 W Xenon lamp.

**Table S1.** Elemental analysis results of Bpy-CTF and B-CTF.

|         | N (%) |       | C (%) |       | H (%) |      |
|---------|-------|-------|-------|-------|-------|------|
|         | Exp.  | Cal.  | Exp.  | Cal.  | Exp.  | Cal. |
| Bpy-CTF | 21.41 | 27.76 | 65.19 | 66.65 | 3.25  | 5.59 |
| B-CTF   | 15.55 | 20.40 | 69.66 | 74.98 | 3.81  | 46.1 |

**Table S2.** Optical gap, band positions and oxygen evolution rates (OERs) of Bpy-CTF and B-CTF.

|         | Optical gap (eV) | Water contact angle (°) | Transmittance (%) | OER <sup>a</sup> (μmol g <sup>-1</sup> h <sup>-1</sup> ) |
|---------|------------------|-------------------------|-------------------|----------------------------------------------------------|
| Bpy-CTF | 2.21             | - <sup>b</sup>          | 1.95              | 322                                                      |
| B-CTF   | 2.07             | 68.2                    | 1.38              | 162                                                      |

<sup>a</sup>Reaction conditions: 10 mg CTF photocatalysts loaded with 3 wt.% cobalt was suspended in water/AgNO<sub>3</sub>/La<sub>2</sub>O<sub>3</sub>, 300 W Xe light source visible light (≥ 420 nm) irradiation; <sup>b</sup>Not determined as sample swells in contact with water

**Table S3.** ICP analysis result of Bpy-CTF-Co-x and B-CTF-Co-x.

|                | Initial Co loading (wt. %) | Co amount (ICP result) (wt. %) |
|----------------|----------------------------|--------------------------------|
| Bpy-CTF-Co-0.5 | 0.5                        | 0.48                           |
| Bpy-CTF-Co-1   | 1                          | 0.72                           |
| Bpy-CTF-Co-3   | 3                          | 2.50                           |
| Bpy-CTF-Co-5   | 5                          | 3.66                           |
| B-CTF-Co-1     | 1                          | 0.29                           |
| B-CTF-Co-3     | 3                          | 0.90                           |

**Table S4.** Estimated fluorescence life-times calculated from time correlated single photon counting measurements results.

| CTFs         | τ <sub>1</sub> <sup>a</sup> | B <sub>1</sub> <sup>a</sup> | τ <sub>2</sub> <sup>a</sup> | B <sub>2</sub> <sup>a</sup> | τ <sub>3</sub> <sup>a</sup> | B <sub>3</sub> <sup>a</sup> | χ <sup>2</sup> | τ <sub>AVG</sub> <sup>b</sup> |
|--------------|-----------------------------|-----------------------------|-----------------------------|-----------------------------|-----------------------------|-----------------------------|----------------|-------------------------------|
|              | (ns)                        | (%)                         | (ns)                        | (%)                         | (ns)                        | (%)                         |                | (ns)                          |
| Bpy-CTF      | 0.563                       | 47.258                      | 2.389                       | 45.892                      | 9.12                        | 6.849                       | 1.219          | 1.99                          |
| Bpy-CTF-Co-3 | 0.487                       | 65.46                       | 2.222                       | 31.955                      | 10.766                      | 2.585                       | 1.695          | 1.31                          |

<sup>a</sup>Fluorescence life-times for all polymers in ethanol suspension obtained from fitting time-correlated single photon counting decays to a sum of three exponentials, which yield τ<sub>1</sub>, τ<sub>2</sub>, and

τ<sub>3</sub> according to  $\sum_{i=1}^n (A + B_i \exp(-\frac{t}{\tau_i}))$ . <sup>b</sup>τ<sub>AVG</sub> is the weighted average lifetime calculated as  $\sum_{i=1}^n B_i \tau_i$ .

**Table S5.** Overview of reported polymer photocatalysts for OER.

|                                       | Band gap (eV) | Co-catalyst                | Sacrificial agent                                                  | OER ( $\mu\text{mol g}^{-1} \text{h}^{-1}$ ) | AQY (%)       | Light source | Ref.      |
|---------------------------------------|---------------|----------------------------|--------------------------------------------------------------------|----------------------------------------------|---------------|--------------|-----------|
| Bpy-CTF                               | 2.21          | 3 wt.% Co                  | 0.01 M AgNO <sub>3</sub> ,<br>0.2 g La <sub>2</sub> O <sub>3</sub> | 322 ( $\geq 420$ nm)                         | 0.56 (420 nm) | 300 W Xe     | This work |
| CTP-2                                 | 2.66          | 3 wt.% Co                  | 0.01 M AgNO <sub>3</sub> ,<br>0.2 g La <sub>2</sub> O <sub>3</sub> | 100 ( $> 300$ nm)<br>50 ( $\geq 420$ nm)     | -             | 300 W Xe     | [3]       |
| g-C <sub>3</sub> N <sub>4</sub>       | 2.76          | 3 wt.% Co(OH) <sub>2</sub> | 0.01 M AgNO <sub>3</sub> ,<br>0.2 g La <sub>2</sub> O <sub>3</sub> | 548 ( $> 300$ nm)<br>142 ( $> 420$ nm)       | -             | 300 W Xe     | [4]       |
| CTF-1-100W                            | 2.50          | 3 wt.% RuO <sub>x</sub>    | 0.2 M AgNO <sub>3</sub><br>(0.05 M AgNO <sub>3</sub> )             | 140 ( $> 420$ nm)                            | 3.8 (420 nm)  | 300 W Xe     | [5]       |
| CTF-T1                                | 2.94          | RuO <sub>2</sub>           | 0.01 M AgNO <sub>3</sub> ,<br>0.2 g La <sub>2</sub> O <sub>3</sub> | 9 ( $> 420$ nm)                              | -             | 300 W Xe     | [6]       |
| P10                                   | 2.62          | 1 wt.% Co                  | 0.01 M AgNO <sub>3</sub> ,<br>0.2 g La <sub>2</sub> O <sub>3</sub> | 104 ( $> 420$ nm),<br>332 (full arc)         | -             | 300 W Xe     | [7]       |
| BpCo-COF-1                            | 2.41          | 1 wt.% Co                  | 0.005 M AgNO <sub>3</sub>                                          | 152 ( $> 420$ nm)                            | 0.46 (420 nm) | 300 W Xe     | [8]       |
| g-C <sub>40</sub> N <sub>3</sub> -COF | 2.36          | 3 wt.% Co                  | 0.01 M AgNO <sub>3</sub> ,<br>0.2 g La <sub>2</sub> O <sub>3</sub> | 50 ( $> 420$ nm)                             |               | 300 W Xe     | [9]       |
| aza-CMP nanosheet                     | 1.22          | 3 wt.% Co(OH) <sub>2</sub> | 0.01 M AgNO <sub>3</sub> ,<br>La <sub>2</sub> O <sub>3</sub>       | 572 ( $> 420$ nm)                            | -             | 300 W Xe     | [10]      |
| Urea-PDI                              | 1.79          | None                       | 0.05 M AgNO <sub>3</sub> ,<br>0.1 g La <sub>2</sub> O <sub>3</sub> | 3223.9 ( $> 420$ nm)                         | 3.86 (450 nm) | 300 W Xe     | [11]      |
| PTPP                                  | 1.52          | None                       | 0.01 M AgNO <sub>3</sub> ,<br>La <sub>2</sub> O <sub>3</sub>       | 236 ( $> 420$ nm)                            | 2.11 (420 nm) | 300 W Xe     | [12]      |
| PQL                                   | 1.72          | None                       | 0.01 M AgNO <sub>3</sub> ,<br>La <sub>2</sub> O <sub>3</sub>       | 60 ( $> 420$ nm)                             | 0.43 (420 nm) | 300 W Xe     | [12]      |



## References

- [1] K. Wang, L.M. Yang, X. Wang, L. Guo, G. Cheng, C. Zhang, S. Jin, B. Tan, A. Cooper, Covalent Triazine Frameworks via a Low-Temperature Polycondensation Approach, *Angew. Chemie - Int. Ed.* 56 (2017) 14149–14153. <https://doi.org/10.1002/anie.201708548>.
- [2] L. Guo, X. Wang, Z. Zhan, Y. Zhao, L. Chen, T. Liu, B. Tan, S. Jin, Crystallization of Covalent Triazine Frameworks via a Heterogeneous Nucleation Approach for Efficient Photocatalytic Applications, *Chem. Mater.* 33 (2021) 1994–2003. <https://doi.org/10.1021/acs.chemmater.0c03716>.
- [3] Z.A. Lan, Y. Fang, Y. Zhang, X. Wang, Photocatalytic Oxygen Evolution from Functional Triazine-Based Polymers with Tunable Band Structures, *Angew. Chemie - Int. Ed.* 57 (2018) 470–474. <https://doi.org/10.1002/anie.201711155>.
- [4] G. Zhang, S. Zang, X. Wang, Layered Co(OH)<sub>2</sub> deposited polymeric carbon nitrides for photocatalytic water oxidation, *ACS Catal.* 9 (2015) 941–947. <https://doi.org/10.1021/cs502002u>.
- [5] J. Xie, S.A. Shevlin, Q. Ruan, S.J.A. Moniz, Y. Liu, X. Liu, Y. Li, C.C. Lau, Z.X. Guo, J. Tang, Efficient visible light-driven water oxidation and proton reduction by an ordered covalent triazine-based framework, *Energy Environ. Sci.* 11 (2018) 1617–1624. <https://doi.org/10.1039/c7ee02981k>.
- [6] J. Bi, W. Fang, L. Li, J. Wang, S. Liang, Y. He, M. Liu, L. Wu, Covalent Triazine-Based Frameworks as Visible Light Photocatalysts for the Splitting of Water, *Macromol. Rapid Commun.* 36 (2015) 1799–1805. <https://doi.org/10.1002/marc.201500270>.
- [7] R.S. Sprick, Z. Chen, A.J. Cowan, Y. Bai, C.M. Aitchison, Y. Fang, M.A. Zwijnenburg, A.I. Cooper, X. Wang, Water oxidation with cobalt-loaded linear conjugated polymer photocatalysts, *Angew. Chemie Int. Ed.* 132 (2020) 18854–18859. <https://doi.org/10.1002/anie.202008000>.
- [8] J. Chen, X. Tao, C. Li, Y. Ma, L. Tao, D. Zheng, J. Zhu, H. Li, R. Li, Q. Yang, Synthesis of bipyridine-based covalent organic frameworks for visible-light-driven photocatalytic water oxidation, *Appl. Catal. B Environ.* 262 (2020) 1–8. <https://doi.org/10.1016/j.apcatb.2019.118271>.
- [9] S. Bi, C. Yang, W. Zhang, J. Xu, L. Liu, D. Wu, X. Wang, Y. Han, Q. Liang, F. Zhang, Two-dimensional semiconducting covalent organic frameworks via condensation at arylmethyl carbon atoms, *Nat. Commun.* 10 (2019) 1–10. <https://doi.org/10.1038/s41467-019-10504-6>.
- [10] L. Wang, Y. Wan, Y. Ding, Y. Niu, Y. Xiong, X. Wu, H. Xu, Photocatalytic oxygen evolution from low-bandgap conjugated microporous polymer nanosheets: a combined first-principles calculation and experimental study, *Nanoscale.* 9 (2017) 4090–4096. <https://doi.org/10.1039/c7nr00534b>.
- [11] Z. Zhang, X. Chen, H. Zhang, W. Liu, W. Zhu, Y. Zhu, A Highly Crystalline Perylene Imide Polymer with the Robust Built-In Electric Field for Efficient Photocatalytic Water Oxidation, *Adv. Mater.* 1907746 (2020) 1–6. <https://doi.org/10.1002/adma.201907746>.

- [12] X. Ma, H. Wang, J. Cheng, H. Cheng, L. Wang, X. Wu, H. Xu, Fully Conjugated Ladder Polymers as Metal-Free Photocatalysts for Visible-Light-Driven Water Oxidation, *Chinese J. Chem.* 39 (2021) 1079–1084.  
<https://doi.org/10.1002/cjoc.202000614>.
